# Supplementary material for: Field-induced assembly of colloidal ellipsoids into well-defined microtubules
Source: PubMed Central journal article supplement (PMC4263160; doi:10.1038/ncomms6516), 2014-11-20
Supplement: ncomms6516-s1.pdf [file ncomms6516-s1.pdf]

## Shape matters for a new colloidal self-assembly mechanism for synthetic microtubules

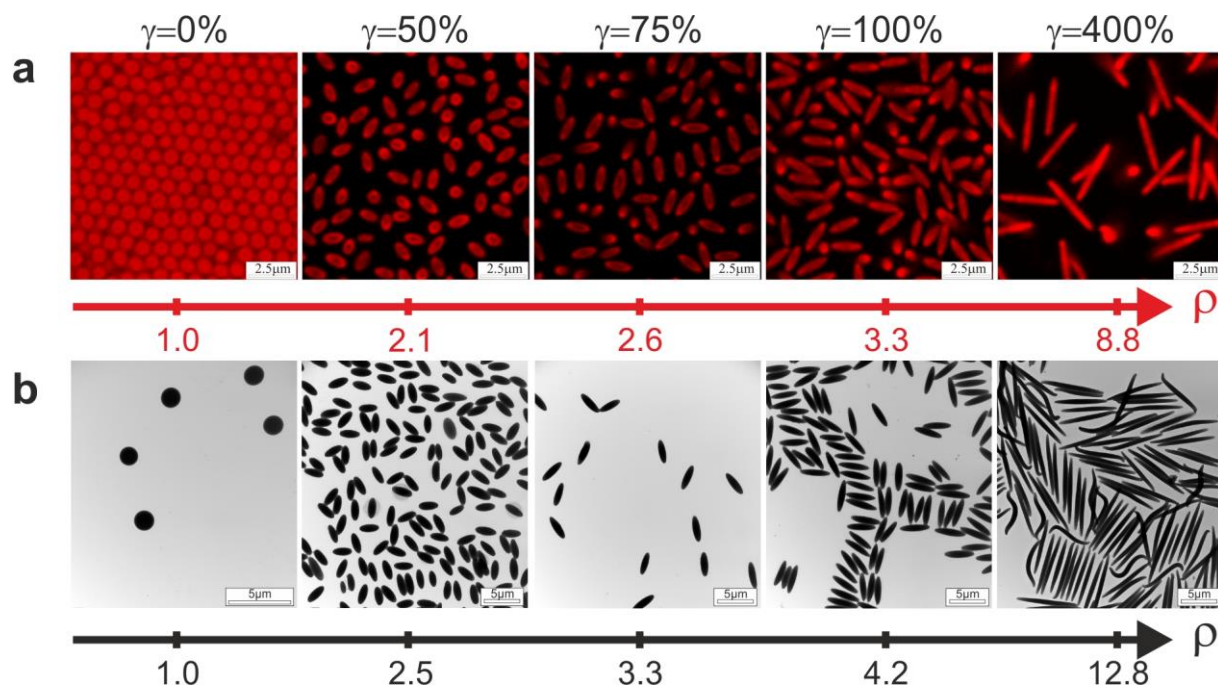

**Supplementary Fig. 1 | Microscopy of composite ellipsoidal microgels synthesized with different aspect ratios.** Microscopic characterization of the composite microgel morphologies obtained at different uniaxial deformation ( $\gamma$ ). CLSM (a) and TEM micrographs (b) of the core-shell particles at the water/glass interface and in air on carbon-coated copper grids, respectively. The evolution of the aspect ratio ( $\rho$ ) determined from the analysis of the different micrographs with the two different techniques is indicated as a function of the deformation.

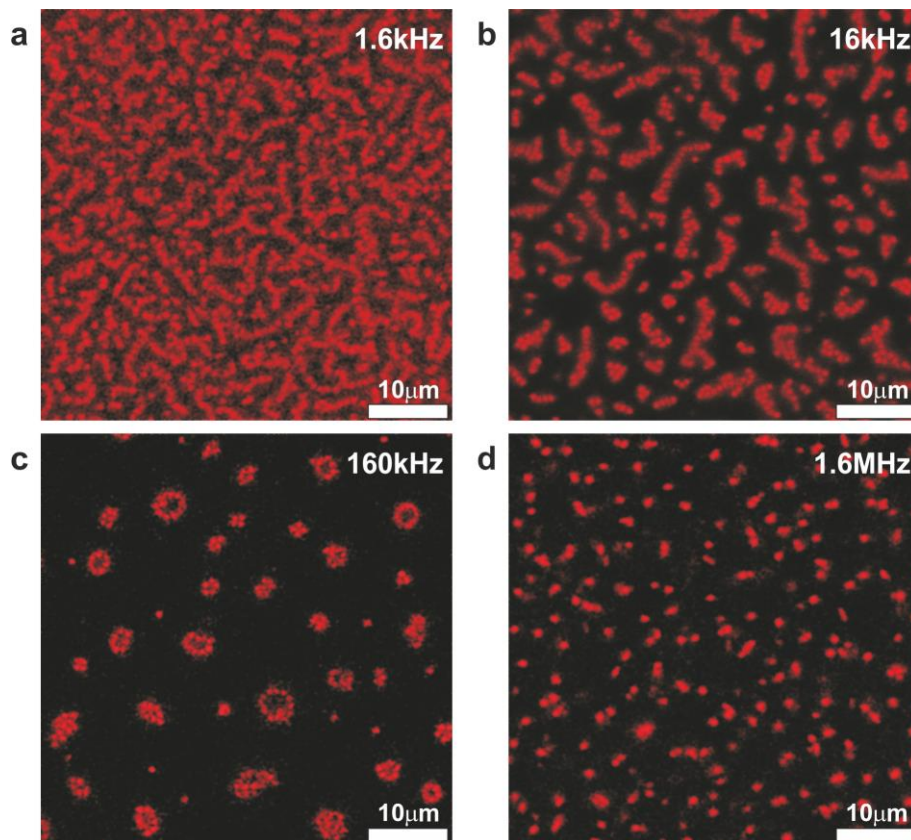

**Supplementary Fig. 2 | Frequency dependence of the self-assembly.** CLSM  $xy$ -images showing the assemblies formed by a 1 wt% ellipsoidal composite microgel dispersion ( $\rho = 3.3$ ) in response to an applied AC electric field  $E = 125 \text{ kV m}^{-1}$  as a function of frequency. The applied range of frequencies varied from  $f = 1.6 \text{ kHz}$  to  $1.6 \text{ MHz}$ . Representative images show the formation of (a) solid worm-like lattices formed in the vicinity of the electrodes at  $f = 1.6 \text{ kHz}$ , (b) “dynamic” worm-like lattices which extend over  $10 \mu\text{m}$  in the  $z$ -plane at  $f = 16 \text{ kHz}$ , (c) tubular structures at  $f = 160 \text{ kHz}$ , and (d) a partially aligned fluid at  $f = 1.6 \text{ MHz}$ . All structures formed are fully reversible, and the colloidal dispersions relax to their initial fluid-like disordered state after the field is turned off.

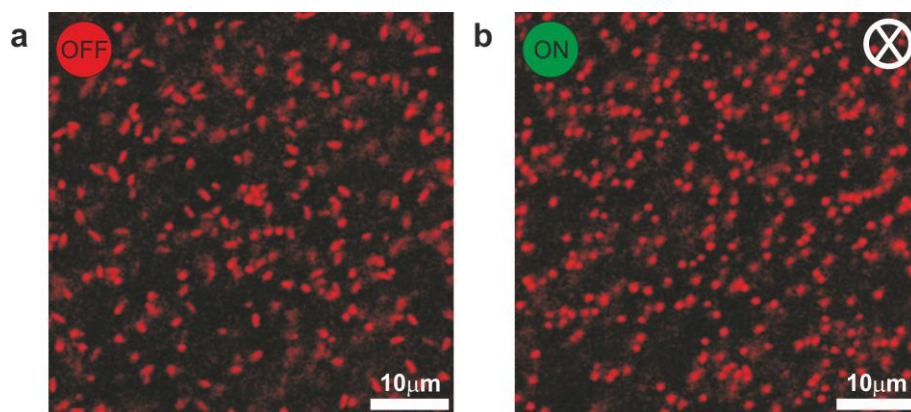

**Supplementary Fig. 3 | Salt effect on the dipolar association.** The experiment was performed on a 1 wt% ellipsoidal dispersion ( $\rho = 3.3$ ) containing 1 mM KCl under an AC electric field  $E = 125 \text{ kV m}^{-1}$  with a frequency,  $f = 160 \text{ kHz}$ . The CLSM  $xy$ -images correspond to (a) randomly orientated ellipsoids (disordered particle fluid), (b) oriented ellipsoids with their major axes aligned in the field direction (aligned particle fluid).

**Supplementary Table 1**

| $\gamma$                    | 0%           | 50%           | 75%           | 100%           | 400%           |
|-----------------------------|--------------|---------------|---------------|----------------|----------------|
| $2a$ [nm] CLSM              | $824 \pm 47$ | $1276 \pm 81$ | $1528 \pm 88$ | $1770 \pm 117$ | $3308 \pm 176$ |
| $2b$ [nm] CLSM              | $824 \pm 47$ | $614 \pm 50$  | $591 \pm 38$  | $542 \pm 42$   | $381 \pm 26$   |
| $\rho$ (CLSM)               | 1            | $2.1 \pm 0.1$ | $2.6 \pm 0.2$ | $3.3 \pm 0.2$  | $8.8 \pm 0.7$  |
| $2a$ [nm] TEM               | $623 \pm 31$ | $1149 \pm 58$ | $1401 \pm 71$ | $1634 \pm 90$  | $3408 \pm 267$ |
| $2b$ [nm] TEM               | $623 \pm 31$ | $459 \pm 28$  | $424 \pm 22$  | $392 \pm 28$   | $270 \pm 32$   |
| $\rho$ (TEM)                | 1            | $2.5 \pm 0.1$ | $3.3 \pm 0.2$ | $4.2 \pm 0.3$  | $12.8 \pm 1.6$ |
| $2a_c$ [nm] TEM             | 534          | 986           | 1184          | 1388           | 2920           |
| $2b_c$ [nm] TEM             | 534          | 393           | 359           | 331            | 228            |
| $\rho$ (TEM)                | 1            | 2.5           | 3.3           | 4.2            | 12.8           |
| $t_a$ [nm]                  | 145          | 145           | 172           | 191            | 194            |
| $t_b$ [nm]                  | 145          | 111           | 116           | 105            | 76             |
| $R_h$ at 20°C [nm] (DLS)    | 537          | 499           | 501           | 527            | 670            |
| $R_h$ at 50°C [nm] (DLS)    | 348          | 333           | -             | 428            | 493            |
| $Q_{eff}$ at 20°C [ $e^-$ ] | 2104         | 1779          | 1601          | 1767           | 2148           |

**Supplementary Table 1 | Summary of the main characterization results.** Average dimensions and aspect ratios of the composite microgel particles stretched at a deformation of  $\gamma = 0\%$ ,  $50\%$ ,  $75\%$ ,  $100\%$  and  $400\%$  determined from statistical analysis of CLSM and TEM micrographs. The notations  $2a$ ,  $2b$  refer to the long and short full axis of the particles and  $2a_c$ ,  $2b_c$  to the long and short full axis of the PS core.  $t_a$  and  $t_b$  indicate the PNIPMAm shell thickness along the long and short axis, and  $\rho$  the determined aspect ratio. This table further includes the apparent hydrodynamic radius  $R_h$  measured by DLS at 20°C and 50°C and the effective charge of the different particles  $Q_{eff}$  estimated at 20°C from the combination of DLS and electrophoretic measurements of the different core-shell particles.
